# Supplementary material for: Acute effects of optimal power load flywheel half-squat training on lower limb explosive power under different load volumes
Source: PeerJ. 2025 Apr 18;13:e19321. doi: 10.7717/peerj.19321 (PMC12011011; doi:10.7717/peerj.19321)
Supplement: Supplemental Information 1 [file peerj-13-19321-s001.xlsx]

## Sheet: Sheet1
group	subject	pre-test（cm）	0min-test（cm）	4min-test（cm）	8min-test（cm）	12min-test（cm）
Control group	subject（1）	44.92	45.32	43.95	46.12	44.73
Control group	subject（2）	48.45	49.31	49.85	46.72	46.21
Control group	subject（3）	57.37	57.35	59.82	54.08	56.9
Control group	subject（4）	50.31	52.85	50.24	50.81	49.99
Control group	subject（5）	44.26	44.93	43.85	43.6	45.37
Control group	subject（6）	51.56	52.77	53.2	52.89	50.1
Control group	subject（7）	49.46	48.21	48.1	51.16	47.62
Control group	subject（8）	50.37	46.12	48.53	44.71	45.34
Control group	subject（9）	54.34	52.77	51.85	52.46	50.18
Control group	subject（10）	48.44	50.13	49.92	49.8	48.59
Control group	subject（11）	46.24	48.53	44.32	47.61	45.66
Control group	subject（12）	52.76	52.4	50.13	53.19	52.28
Control group	subject（13）	49.77	50.83	49.24	48.19	51.62
Control group	subject（14）	49.69	48.6	47.23	50.36	47.7
Control group	subject（15）	40.1	42.42	42.64	41.18	40.94
Control group	subject（16）	47.64	48.59	46.22	49.73	48.46
Control group	subject（17）	41.17	42.21	41.88	40.94	41.59
Control group	subject（18）	43.24	41.93	44.72	43.27	41.53
Control group	subject（19）	43.59	41.25	43.93	40.12	41.29
Control group	subject（20）	42.71	40.24	43.12	42.8	41.19
Experimental Group A	subject（1）	46.14	46.39	47.15	47.59	49.44
Experimental Group A	subject（2）	48.72	50.02	49.63	50.06	52.47
Experimental Group A	subject（3）	57.21	56.17	58.4	58.18	52.2
Experimental Group A	subject（4）	50.05	48.07	52.07	51.49	51.79
Experimental Group A	subject（5）	45.27	44.95	45.79	46.72	46.26
Experimental Group A	subject（6）	51.96	50.96	52.85	52.59	51.89
Experimental Group A	subject（7）	50.03	50.33	51.39	51.62	54.55
Experimental Group A	subject（8）	44.41	43.39	45.48	45.95	44.23
Experimental Group A	subject（9）	51.29	49.81	52.3	52.79	51.42
Experimental Group A	subject（10）	51.22	50.87	51.42	52.98	50.59
Experimental Group A	subject（11）	47.69	45.82	48.75	48.93	46.41
Experimental Group A	subject（12）	54.54	54.41	55.72	56.02	55.88
Experimental Group A	subject（13）	51.49	49.26	52.56	53.05	52.06
Experimental Group A	subject（14）	46.31	45.97	48.05	49.07	46.97
Experimental Group A	subject（15）	41.02	39.88	42.31	41.94	43.7
Experimental Group A	subject（16）	48.06	47.25	49.11	49.95	47.16
Experimental Group A	subject（17）	40.28	40.45	42.34	41.79	40.49
Experimental Group A	subject（18）	44.97	44.7	46.01	46.16	44.54
Experimental Group A	subject（19）	43.86	43.18	45.04	45.05	43.95
Experimental Group A	subject（20）	43.71	45.41	44.84	45.72	46.43
Experimental Group B	subject（1）	45.01	44.24	47.96	48.6	45.43
Experimental Group B	subject（2）	49.87	49.01	52.22	54.41	52.91
Experimental Group B	subject（3）	54.16	53.92	55.66	56.98	54.22
Experimental Group B	subject（4）	55.98	55.81	56.34	57.87	56.59
Experimental Group B	subject（5）	44.61	43.82	45.84	45.72	48.12
Experimental Group B	subject（6）	48.24	42.74	55.04	56.18	51.59
Experimental Group B	subject（7）	48.51	48.14	50.93	52.79	53.66
Experimental Group B	subject（8）	46.17	45.91	49.86	51.24	49.43
Experimental Group B	subject（9）	51.76	50.99	54.94	55.94	52.18
Experimental Group B	subject（10）	46.13	46.01	51.34	52.89	54.26
Experimental Group B	subject（11）	52.23	51.45	53.84	53.52	54.35
Experimental Group B	subject（12）	51	49	54.05	55.76	53.62
Experimental Group B	subject（13）	51.42	49.83	52.25	53.97	58.87
Experimental Group B	subject（14）	47.69	47.62	49.33	50.12	49.31
Experimental Group B	subject（15）	42.55	45.21	45.77	45.97	42.95
Experimental Group B	subject（16）	48.25	47.53	51.49	52.06	46.06
Experimental Group B	subject（17）	41.23	41.77	41.82	43.48	44.58
Experimental Group B	subject（18）	43.58	42.62	44.85	46.67	47.11
Experimental Group B	subject（19）	42.6	42.11	44.94	45.68	44.87
Experimental Group B	subject（20）	42.4	41.68	48.41	46.97	46.36
Experimental Group C	subject（1）	42.6	42	46.29	47.06	43.06
Experimental Group C	subject（2）	46.93	54.09	56.05	56.31	54.11
Experimental Group C	subject（3）	54.81	54.82	55.87	56.34	55.3
Experimental Group C	subject（4）	48.33	50.36	53.26	55.6	51.1
Experimental Group C	subject（5）	45.29	43.62	45.93	46.14	45.55
Experimental Group C	subject（6）	54.27	42.88	55.89	57.51	54.24
Experimental Group C	subject（7）	50.33	51.21	53.87	56.87	56.39
Experimental Group C	subject（8）	45.32	37.98	43.68	46.01	45.04
Experimental Group C	subject（9）	53.37	50.64	55.91	56.13	51.82
Experimental Group C	subject（10）	48.77	44.32	50.46	53.12	52.81
Experimental Group C	subject（11）	47.93	49.76	52.19	52.79	50.44
Experimental Group C	subject（12）	55.92	51.26	55.41	56.48	57.2
Experimental Group C	subject（13）	52.43	49.81	54.79	55.42	57.98
Experimental Group C	subject（14）	46.13	47.52	50.02	51.17	52.15
Experimental Group C	subject（15）	43.14	41.92	42.73	45.79	48.74
Experimental Group C	subject（16）	51.8	47.55	52.82	53.25	55.66
Experimental Group C	subject（17）	39.01	37.76	41.49	42.61	39.25
Experimental Group C	subject（18）	43.87	42.15	46.94	48.06	49.53
Experimental Group C	subject（19）	42.56	46.17	47.98	48.88	46.72
Experimental Group C	subject（20）	42.97	43.13	45.89	47.03	46.05
